# Supplementary material
Source: PubMed Central journal article supplement (PMC6690410)
Supplement: drm-0235-0348-s02.pdf [file drm-0235-0348-s02.pdf]

**Supplemental Fig 1.** Youden Plots of Predictability of IGA×BSA for PASI 90 and DLQI 0/1 at (A) Week 12, (B) Week 24, and (C) Week 52 (pooled secukinumab 300 mg treatment group)

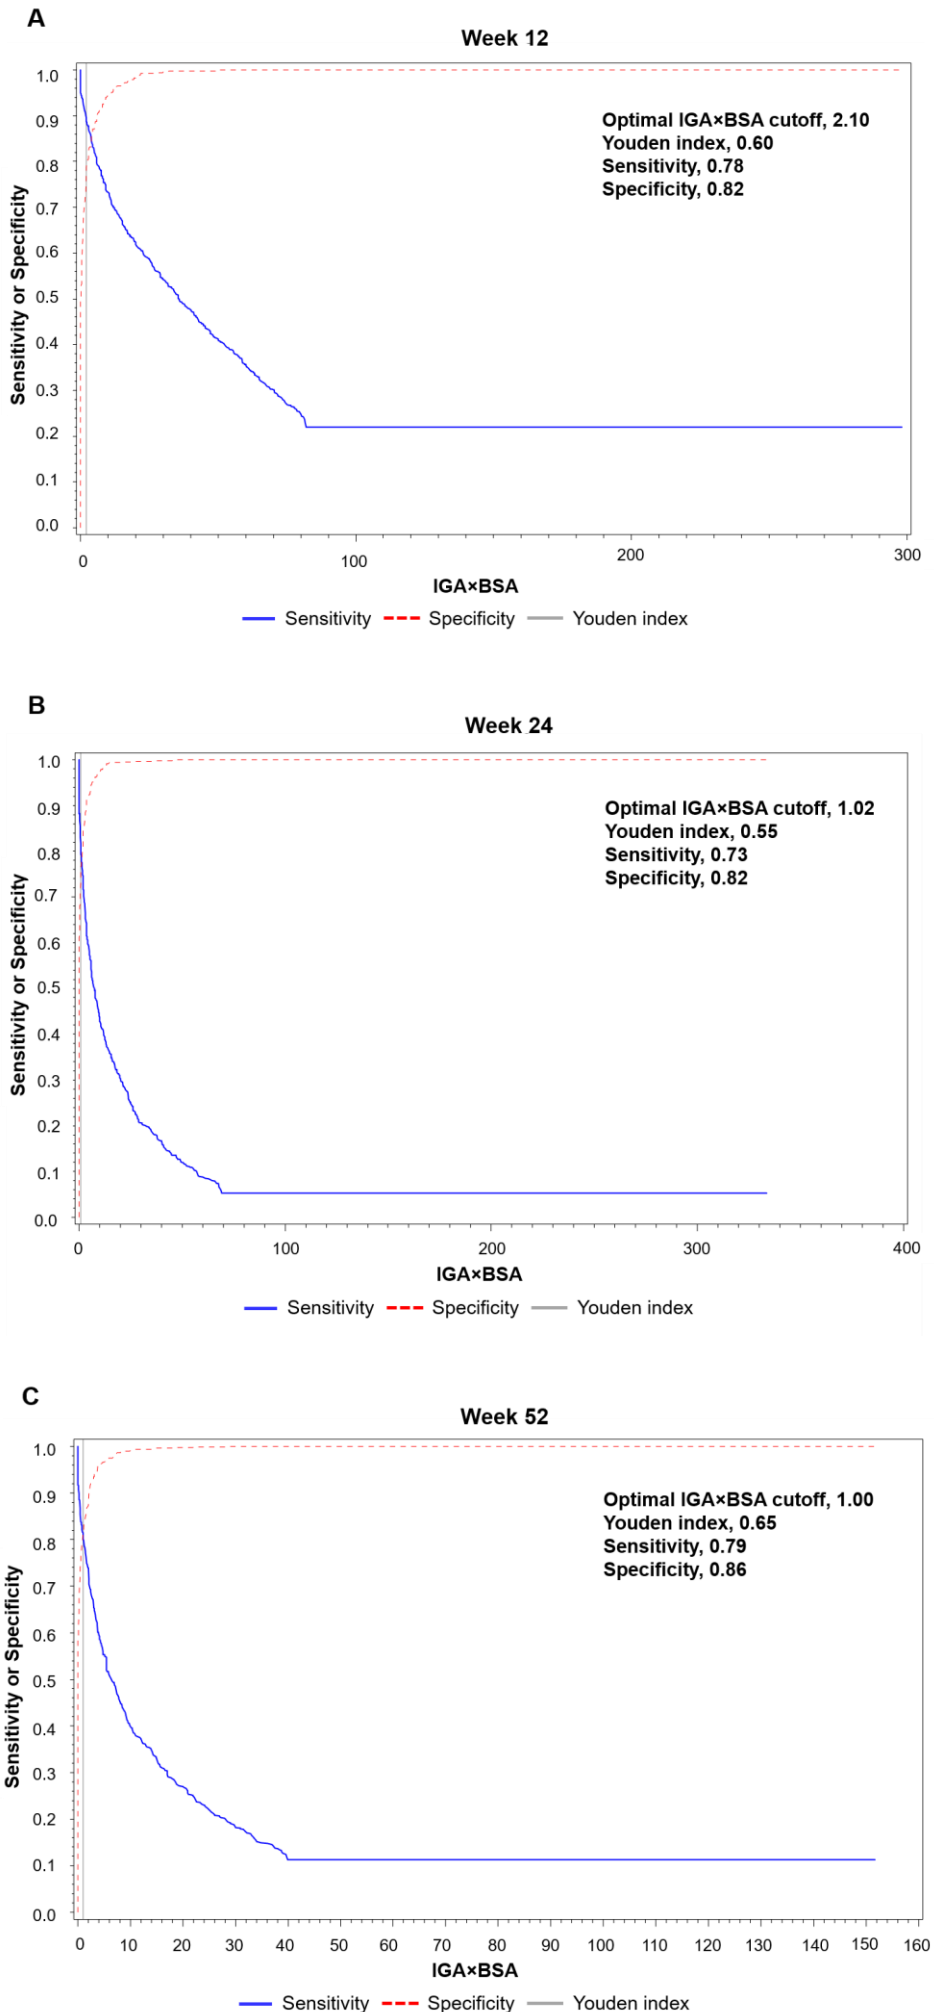

**Supplemental Fig 2.** Youden Plots of Predictability of IGA×BSA for PASI ≤ 1 or BSA < 3% at (A) Week 12, (B) Week 24, and (C) Week 52 (pooled secukinumab 300 mg treatment group)

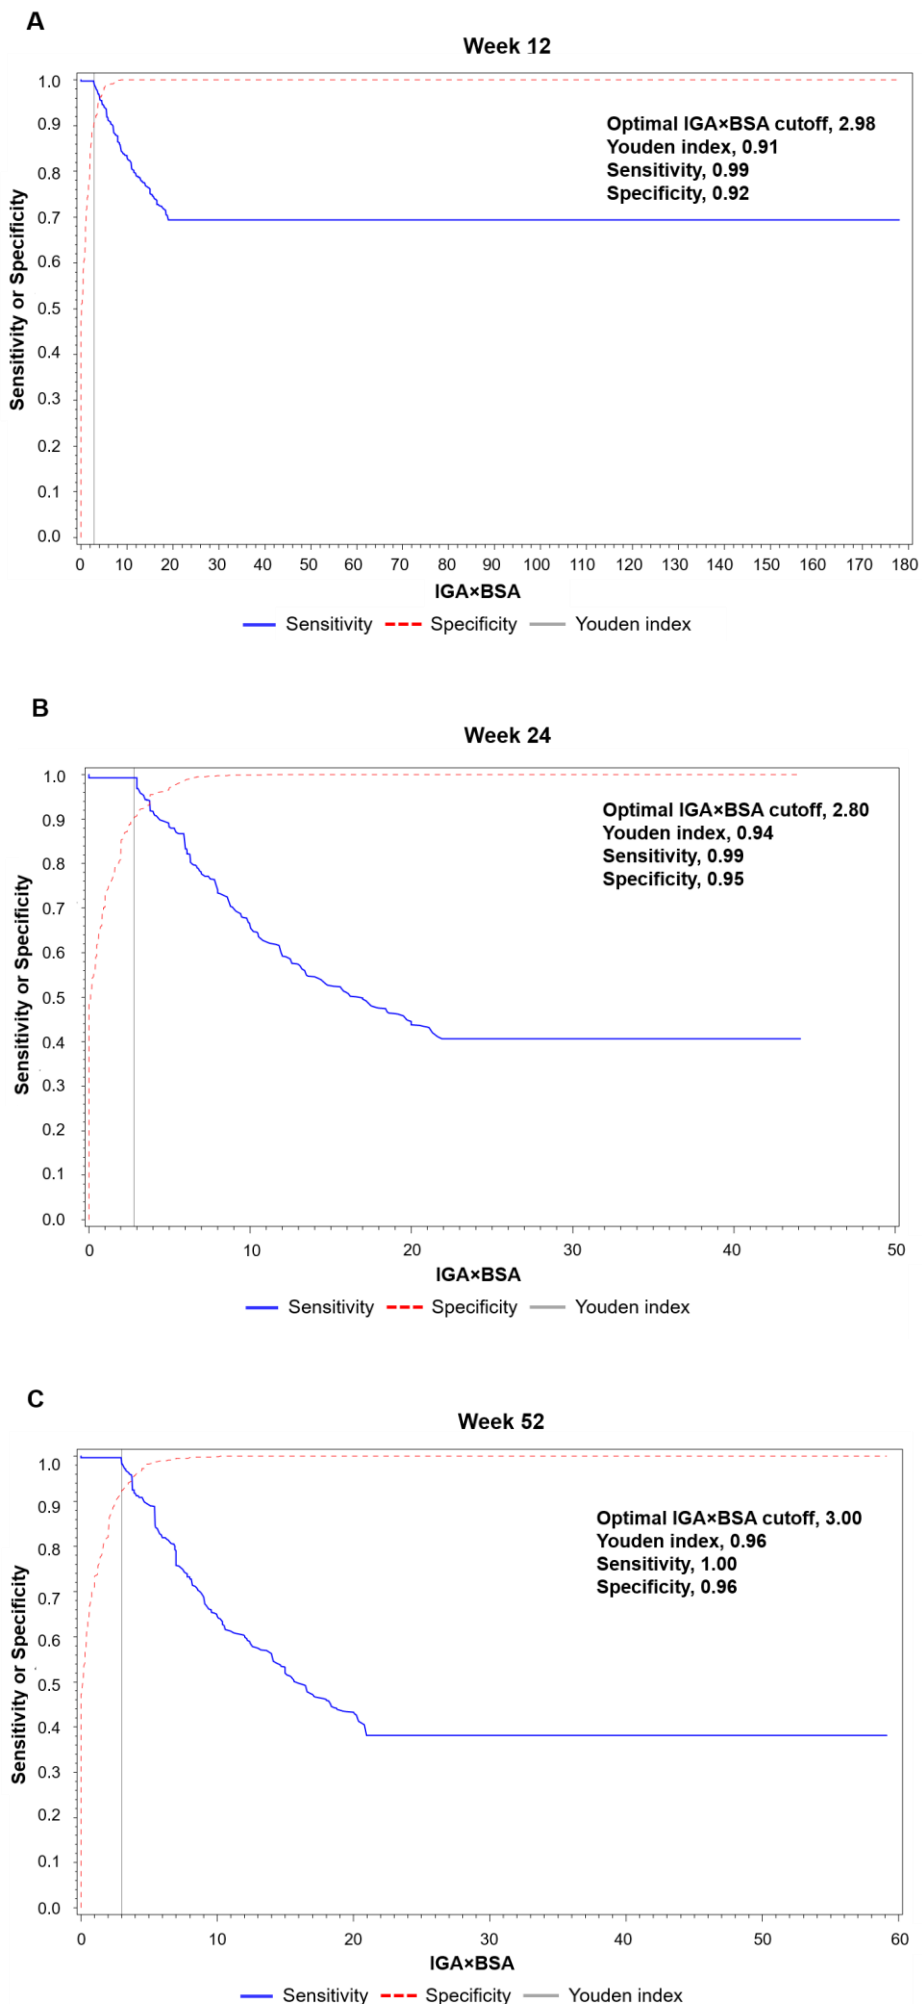

## SUPPLEMENTAL FIGURE LEGENDS

**Supplemental Fig 1.** Youden Plots of Predictability of IGA×BSA for PASI 90 and DLQI 0/1 at (A) Week 12, (B) Week 24, and (C) Week 52 (pooled secukinumab 300 mg treatment group)

Youden index = sensitivity + specificity – 1, which captures the sensitivity and specificity of the diagnostic measure, with a value of 1 equating to a test with no false-positive or -negative results. Sensitivity measures the extent to which true-positive test results are not captured, with the higher rate indicating few false-negative results. Specificity measures the extent to which a positive test accurately represents the test target, with the higher rate indicating few false-positive results. BSA, body surface area; DLQI, Dermatology Life Quality Index; IGA, 5-point Investigator’s Global Assessment; PASI, Psoriasis Area and Severity Index.

**Supplemental Fig 2.** Youden Plots of Predictability of IGA×BSA for PASI Score ≤ 1 or BSA < 3% at (A) Week 12, (B) Week 24, and (C) Week 52 (pooled secukinumab 300 mg treatment group)

Youden index = sensitivity + specificity – 1, which captures the sensitivity and specificity of the diagnostic measure, with a value of 1 equating to a test with no false-positive or -negative results. Sensitivity measures the extent to which true-positive test results are not captured, with the higher rate indicating few false-negative results. Specificity measures the extent to which a positive test accurately represents the test target, with the higher rate indicating few false-positive results. BSA, body surface area; IGA, 5-point Investigator’s Global Assessment; PASI, Psoriasis Area and Severity Index.
